# Supplementary material for: Disentangling the Potential Functions of miRNAs in the Synthesis of Terpenoids during the Development of Cinnamomum burmannii Leaves
Source: MDPI journal article supplement (doi:10.3390/f14030555), 2023-03-11
Supplement: s1 [file s1]

**Table S2** Numbers of DEMs

| Comparisons           | Number | Up-regulated<br>DEMs | Down-regulated<br>DEMs |
|-----------------------|--------|----------------------|------------------------|
| <b>CBTS1_vs_CBTS2</b> | 5      | 1                    | 4                      |
| <b>CBTS1_vs_CBTS3</b> | 93     | 3                    | 90                     |
| <b>CBTS1_vs_CBTS4</b> | 97     | 1                    | 96                     |
| <b>CBTS2_vs_CBTS3</b> | 79     | 10                   | 69                     |
| <b>CBTS2_vs_CBTS4</b> | 94     | 8                    | 86                     |
| <b>CBTS3_vs_CBTS4</b> | 76     | 18                   | 58                     |
