# Supplementary material for: Disentangling the Potential Functions of miRNAs in the Synthesis of Terpenoids during the Development of Cinnamomum burmannii Leaves
Source: MDPI journal article supplement (doi:10.3390/f14030555), 2023-03-11
Supplement: s1 [file s1]

**Table S6 Numbers of DEmiRNAs**

| <b>Comparisons</b>    | <b>Number</b> | <b>Up-regulated<br/>DEmiRNAs</b> | <b>Down-regulated<br/>DEmiRNAs</b> |
|-----------------------|---------------|----------------------------------|------------------------------------|
| <b>CBTS1_vs_CBTS2</b> | 178           | 62                               | 116                                |
| <b>CBTS1_vs_CBTS3</b> | 232           | 88                               | 144                                |
| <b>CBTS1_vs_CBTS4</b> | 252           | 95                               | 157                                |
| <b>CBTS2_vs_CBTS3</b> | 67            | 25                               | 42                                 |
| <b>CBTS2_vs_CBTS4</b> | 239           | 114                              | 125                                |
| <b>CBTS3_vs_CBTS4</b> | 61            | 41                               | 20                                 |
